# Supplementary material for: CsCuAO1 Associated with CsAMADH1 Confers Drought Tolerance by Modulating GABA Levels in Tea Plants
Source: MDPI journal article supplement (doi:10.3390/ijms25020992), 2024-01-12
Supplement: s1 [file s1]

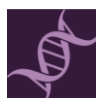

Article

# CsCuAO1 Associated with CsAMADH1 Confers Drought Tolerance by Modulating GABA Levels in Tea Plants

Yu Cao <sup>1,†</sup>, Yiwen Chen <sup>1,†</sup>, Nuo Cheng <sup>1</sup>, Kexin Zhang <sup>1</sup>, Yu Duan <sup>1</sup>, Shimao Fang <sup>1,2</sup>, Qiang Shen <sup>2</sup>, Xiaowei Yang <sup>2</sup>, Wanping Fang <sup>1</sup> and Xujun Zhu <sup>1,\*</sup>

<sup>1</sup> College of Horticulture, Nanjing Agricultural University, Nanjing 210095, China; Yu Cao, 2020104087@stu.njau.edu.cn; Yiwen Chen, 2021104084@stu.njau.edu.cn; Nuo Cheng, 14221125@stu.njau.edu.cn; Kexin Zhang, 2019104086@njau.edu.cn; Yu Duan, 2018204034@njau.edu.cn; Shimao Fang, fsm12340@163.com; Wanping Fang, fangwp@njau.edu.cn  
<sup>2</sup> Tea Research Institute, Guizhou Provincial Academy of Agricultural Sciences, Guiyang 417100, China; Qiang Shen, Shenqiang\_GZU@163.com; Xiaowei Yang, yangxiaowei\_GZU@163.com  
\* Correspondence: author: Prof. Xujun Zhu, College of Horticulture, Nanjing Agricultural University, Nanjing 210095, China; Telephone & Fax: +86-25-84395182  
† These authors contributed equally to this work.

## Supplementary Materials

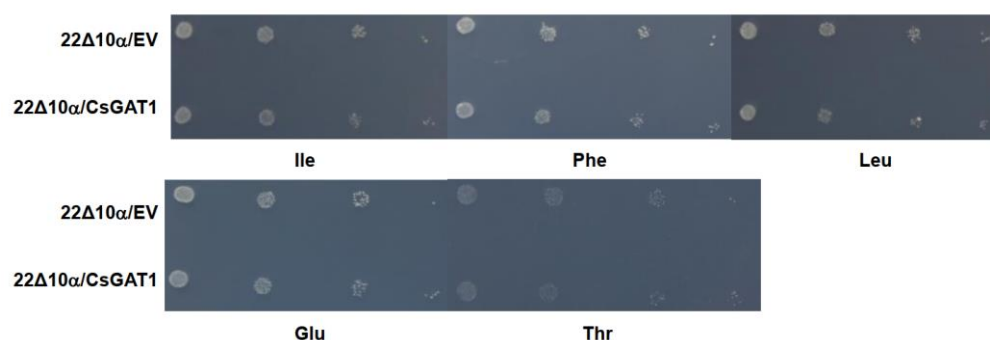

**Figure S1.** Phenotypes of yeast strains with CsGAT recombinant plasmids grown on solid medium, with amino acid as the only nitrogen source.

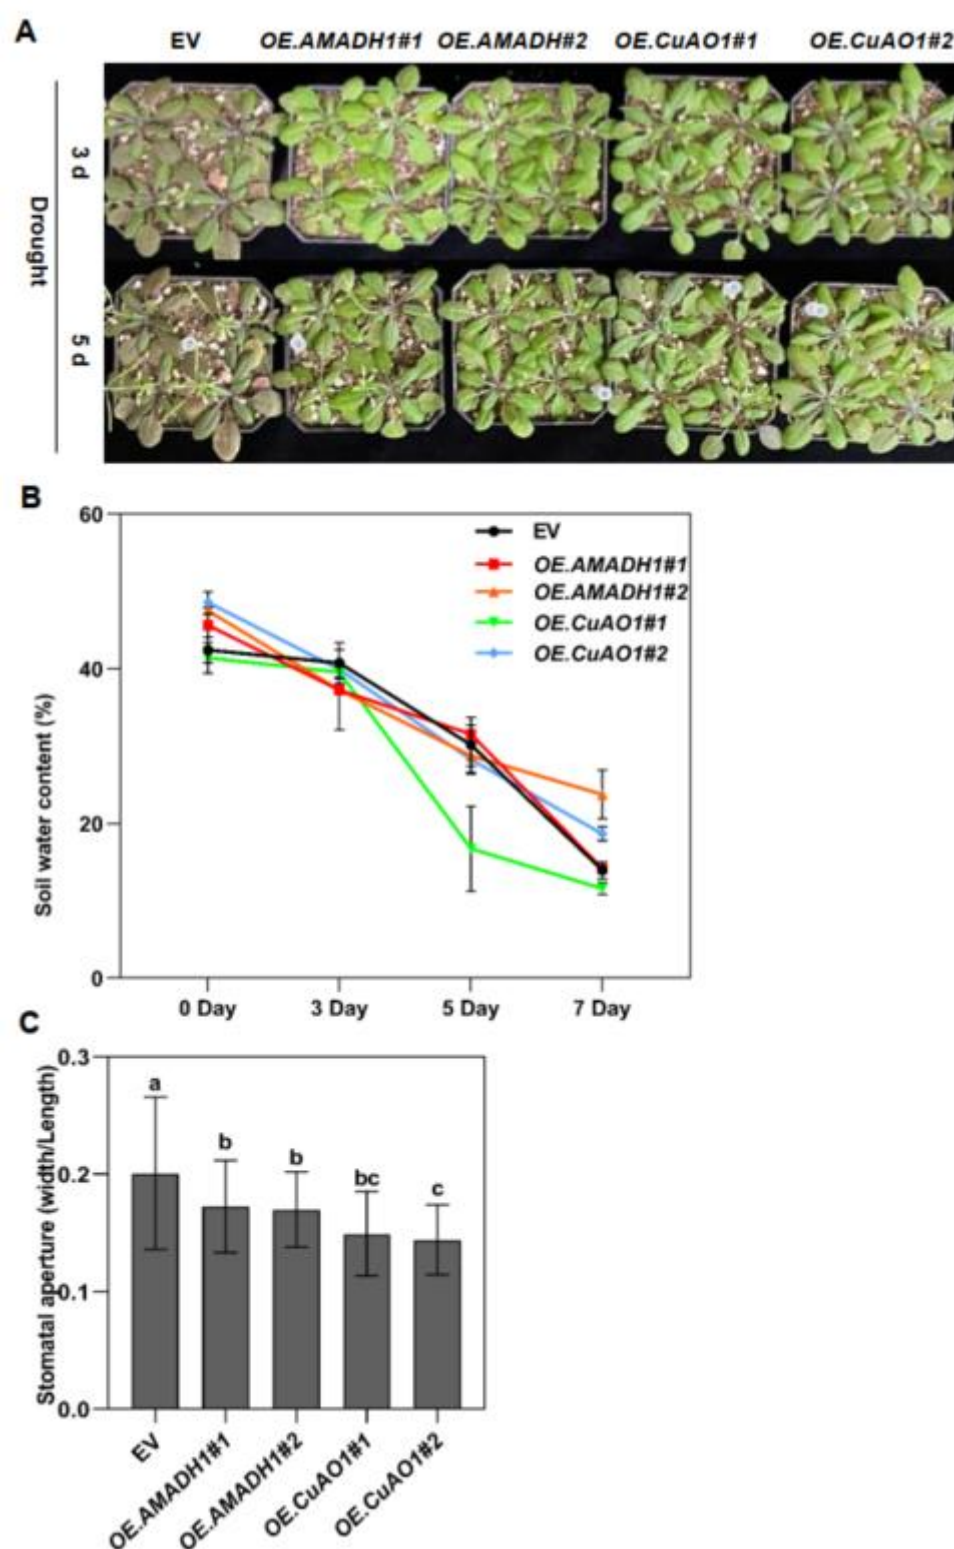

**Figure S2.** The overexpressing *Arabidopsis* lines exhibited high tolerance during drought treatment. (A) Phenotypes of two dependent lines of *CsAMADH1*-overexpressing and *CsCuAO1*-overexpressing four-week-old *Arabidopsis* before and after 3 and 5 days of drought treatment. The overexpressed empty vector (EV) was set as control. (B) Soil water content for each *Arabidopsis* line during drought treatment. (C) Stomatal apertures in guard cells of *Arabidopsis* leaves after 7 d of drought treatment. Different lowercase letters over columns indicate significant differences between lines ( $p < 0.05$ ).

20  
21  
22  
23  
24  
25  
26

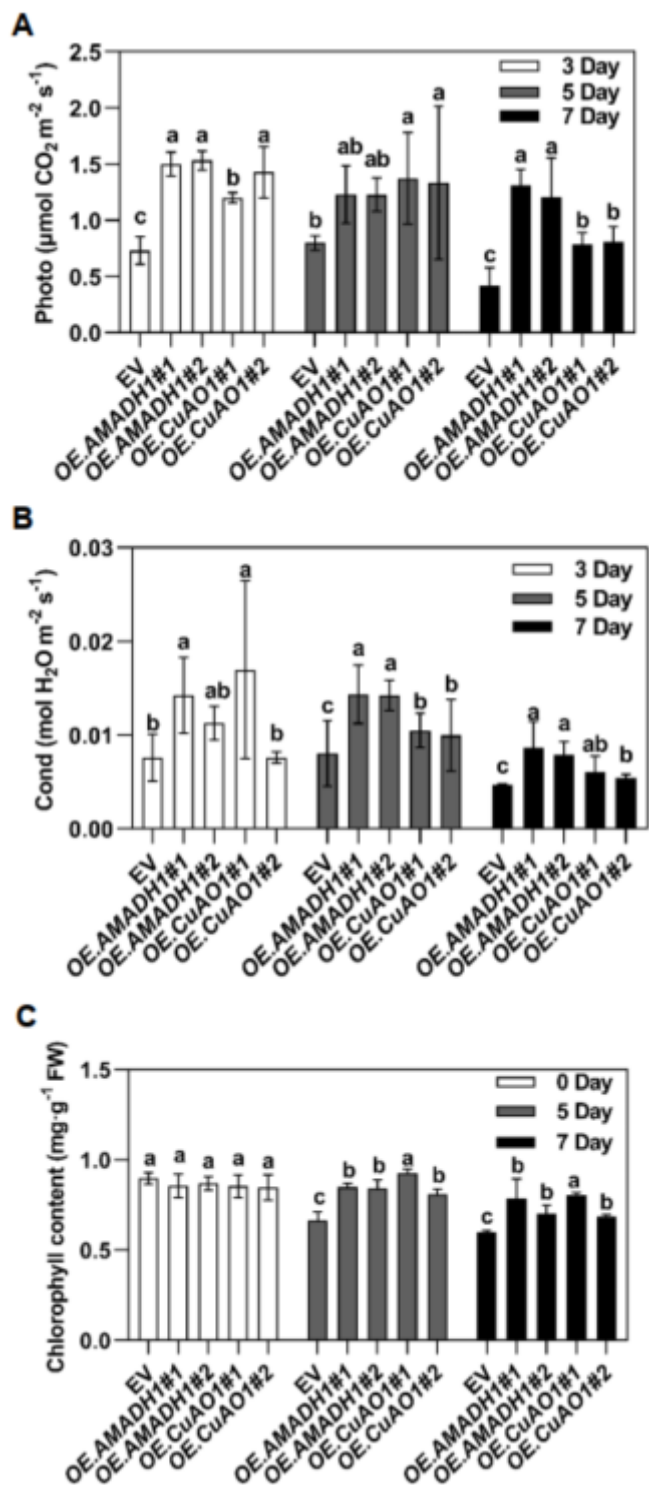

**Figure S3.** (A) Net photosynthetic rate and (B) stomatal conductance of *Arabidopsis* leaves after 7 d of drought treatment. (C) Chlorophyll content of *Arabidopsis* leaves after 7 d of drought treatment. Different lowercase letters over columns indicate significant differences between lines ( $p < 0.05$ ).

27  
28  
29  
30

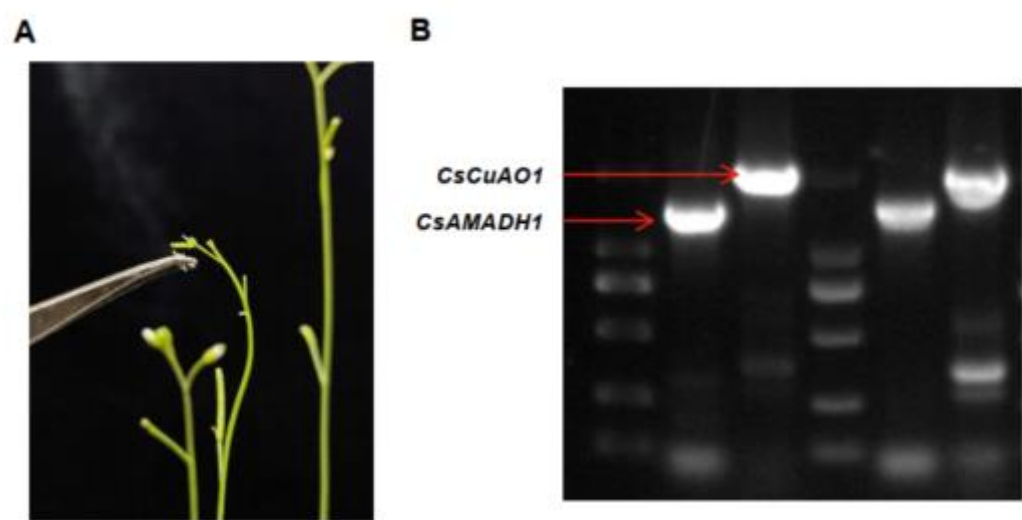

**Figure S4.** The generation of transgenic co-overexpressing lines of *CsCuAO1*–*CsAMADH1*. (A) *CuAO1*-overexpressing and *AMADH1*-overexpressing transgenic *Arabidopsis* were used as male and female parents, respectively, for pollen hybridization. (B) Photograph of electrophoresis analysis of co-overexpressing line.

**Table S1.** Genes used in this study.

| Gene name                                                                                                                                                                                                                                                                                                                      |             |               |
|--------------------------------------------------------------------------------------------------------------------------------------------------------------------------------------------------------------------------------------------------------------------------------------------------------------------------------|-------------|---------------|
|                                                                                                                                                                                                                                             |             |               |
| <b>Copyright:</b> © 2024 by the authors. Licensee MDPI, Basel, Switzerland. This article is an open access article distributed under the terms and conditions of the Creative Commons Attribution (CC BY) license ( <a href="https://creativecommons.org/licenses/by/4.0/">https://creativecommons.org/licenses/by/4.0/</a> ). |             |               |
| Gene name                                                                                                                                                                                                                                                                                                                      | Gene ID     | Template size |
| <i>CsCuAO1</i>                                                                                                                                                                                                                                                                                                                 | TEA029860.1 | 2172bp        |
| <i>CsCuAO3</i>                                                                                                                                                                                                                                                                                                                 | TEA015253.1 | 2040bp        |
| <i>CsAMADH1</i>                                                                                                                                                                                                                                                                                                                | TEA025182.1 | 1515bp        |

**Table S2.** Primers used in this study.

| Primers            | Sequence (5'-3')          | Remarks            |
|--------------------|---------------------------|--------------------|
| <i>Csβ-actin-F</i> | GCCATCTTTGATTGGAATGG      | Internal reference |
| <i>Csβ-actin-R</i> | GGTGCCACAACCTTGATCTT      | Internal reference |
| <i>CsGAT1-F</i>    | GCAGTAGTGACAGTGACTT       | qPCR               |
| <i>CsGAT1-R</i>    | GATGACGACAGACAGTGAT       | qPCR               |
| <i>CsGAD1-F</i>    | AGTGACATCCAGAAAGTCTTGCT   | qPCR               |
| <i>CsGAD1-R</i>    | CACCATTAGTCTTCTTCCTACTGAG | qPCR               |
| <i>CsGAD2-F</i>    | TTCGACATCTGCAAGGTGCTCCA   | qPCR               |
| <i>CsGAD2-R</i>    | ACTTGTTGTTTCCTAGCCAAGAC   | qPCR               |
| <i>CsGAD3-F</i>    | TTTCACATAACAAATGCAACGTC   | qPCR               |
| <i>CsGAD3-R</i>    | CTCCCTTTGTCTTACCACCCAT    | qPCR               |
| <i>CsCuAO1-F</i>   | AAACGCCCAACAACAAAT        | qPCR               |
| <i>CsCuAO1-R</i>   | CGAACAACTCCGAATAAAC       | qPCR               |
| <i>CsCuAO3-F</i>   | TATTGAGATTGCTGGACAC       | qPCR               |
| <i>CsCuAO3-R</i>   | AACCCAAATTCGCCTA          | qPCR               |
| <i>CsAMADH1-F</i>  | AGCCTGTGAAGAAGAAACG       | qPCR               |

|                          |                                                 |                  |
|--------------------------|-------------------------------------------------|------------------|
| <i>CsAMADH1-R</i>        | CCAGCAATAGAACGCAAA                              | qPCR             |
| <i>CsCuAO1-F</i>         | ATGGAAGAAAAGAGCTCCTC                            | PCR              |
| <i>CsCuAO1-R</i>         | GGCAGAAGCAGAAGCCTT                              | PCR              |
| <i>CsCuAO3-F</i>         | ATGGAAGCTTCAACATTGAG                            | PCR              |
| <i>CsCuAO3-R</i>         | AGGTTTGGCAGTGCAATT                              | PCR              |
| <i>CsAMADH1-F</i>        | ATGGCGATCCCAATACCTACTC                          | PCR              |
| <i>CsAMADH1-R</i>        | AAGCTTTGGCTTTGAAGGAGATGGG                       | PCR              |
| <i>CsCuAO1-X-F</i>       | ACACGGGGGACTCTAGAATGGAAGAAAA-<br>GAGCCTCCTC     | PCR              |
| <i>CsCuAO1-B-R</i>       | TGACCACCCGGGGATCCGGCAGAAGCAGAAGCCTT             | PCR              |
| <i>CsCuAO3-X-F</i>       | ACACGGGGGACTCTAGAATGGAAGCTTCAACATT-<br>GAG      | PCR              |
| <i>CsCuAO3-B-R</i>       | TGACCACCCGGGGATCCAGGTTTGGCAGTGCAATT             | PCR              |
| <i>CsAMADH1-X-F</i>      | ACACGGGGGACTCTAGAATGGCGATCCCAATAC-<br>CTACTC    | PCR              |
| <i>CsAMADH1-B-R</i>      | TGACCACCCGGGGATCCAAGCTTTGGCTTT-<br>GAAGGAGATGGG | PCR              |
| <i>AsODN-CsA-MADH1-1</i> | GGCGAGTAGGTATTGGGATC                            | Gene suppression |
| <i>AsODN-CsA-MADH1-2</i> | GAGCTGCAGCAGTCATGATC                            | Gene suppression |
| <i>AsODN-CsA-MADH1-3</i> | ATGGCTGTCGTTTGCCAGTT                            | Gene suppression |
| <i>AsODN-CsCuAO1-1</i>   | CATGTGGAGGTGCAGTCGAG                            | Gene suppression |
| <i>AsODN-CsCuAO1-2</i>   | TTGGGGATTGGTATGTTTCCT                           | Gene suppression |
| <i>AsODN-CsCuAO1-3</i>   | GATTATTTGTGAATGCGCCT                            | Gene suppression |

**Disclaimer/Publisher's Note:** The statements, opinions and data contained in all publications are solely those of the individual author(s) and contributor(s) and not of MDPI and/or the editor(s). MDPI and/or the editor(s) disclaim responsibility for any injury to people or property resulting from any ideas, methods, instructions or products referred to in the content.
